# Supplementary material
Source: Springer Nature journal article supplement (https://www.springermedizin.de/resource/supplementary/12882_2013_756_MOESM3_ESM.pdf/9454642)

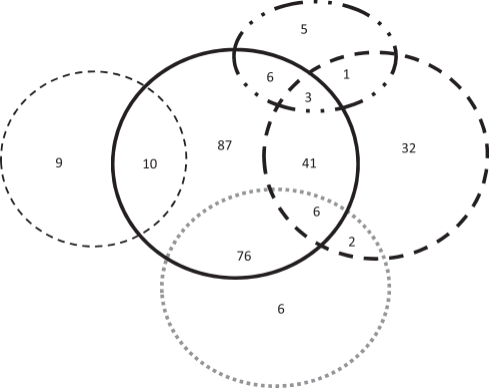

Hypertension

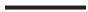

HIV

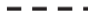

Diabetes

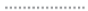

Glomerulonephritis

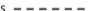

Tubulointerstitial

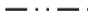

Supplement: MOESM3 [file 9454642]
